# Supplementary material
Source: HighWire-hosted journal article supplement (https://innovations.bmj.com/highwire/filestream/138270/field_highwire_adjunct_files/0/bmjinnov-2019-000347supp001_data_supplement.pdf)
Supplement: bmjinnov-2019-000347supp001_data_supplement.pdf [file bmjinnov-2019-000347supp001_data_supplement.pdf]

**Appendix 1**

| <b>Phrase Length</b> | <b>Technical medical terms</b> | <b>Sentence(s) spoken in English</b>          |
|----------------------|--------------------------------|-----------------------------------------------|
|                      | None                           | Did you get your flu shot this year?          |
|                      |                                | When did the pain start?                      |
|                      |                                | Where did the pain start?                     |
|                      |                                | How often do you feel the pain?               |
|                      |                                | Tell me more about that.                      |
|                      |                                | How old are your parents?                     |
|                      |                                | Do you have any siblings?                     |
|                      |                                | What brings you into the clinic today?        |
|                      |                                | How are you feeling right now?                |
|                      |                                | How would you describe the pain?              |
|                      |                                | Are you married?                              |
|                      |                                | Do you have any questions for me?             |
|                      |                                | What were you doing when the pain started?    |
|                      |                                | What do you do for exercise?                  |
|                      |                                | Have you ever been pregnant?                  |
|                      |                                | Is there anything that makes the pain worse?  |
|                      |                                | Do you smoke tobacco?                         |
|                      |                                | How often do you drink alcohol?               |
|                      |                                | How often do you exercise?                    |
|                      |                                | Is there anything that makes the pain better? |

|                                         |    |                                                   |
|-----------------------------------------|----|---------------------------------------------------|
| One<br>Sentence<br>(8 words<br>or less) |    | Have you had any surgeries?                       |
|                                         |    | Can you tell me about your living situation?      |
|                                         |    | Do you have any medical conditions?               |
|                                         |    | Are you checking your sugar levels every day?     |
|                                         |    | Do you take any medications?                      |
|                                         |    | Have you tried anything to alleviate the pain?    |
|                                         |    | Have you ever been hospitalized?                  |
|                                         |    | Are you sexually active?                          |
|                                         |    | Are you taking any other vitamins or supplements? |
|                                         |    | Were there any complications from the surgery?    |
|                                         |    | Do your parents have any medical conditions?      |
|                                         |    | Have you had neck pain?                           |
|                                         | 1+ | Do you have any ringing in your ears?             |
|                                         |    | Do you have blurry vision?                        |
|                                         |    | We ordered a lipid panel.                         |
|                                         |    | You have a pneumothorax in your right lung.       |
|                                         |    | Are you up to date with your immunizations?       |
|                                         |    | When were you diagnosed with high blood pressure? |
|                                         |    | What was your reaction to penicillin?             |
|                                         |    | When was your last colonoscopy?                   |

|                                         |      |                                                                                                                                                 |
|-----------------------------------------|------|-------------------------------------------------------------------------------------------------------------------------------------------------|
|                                         |      | What other symptoms are you experiencing right now?                                                                                             |
|                                         |      | When did you first start experiencing these symptoms?                                                                                           |
|                                         |      | How often are you experiencing your symptoms?                                                                                                   |
|                                         |      | How often are you experiencing migraines?                                                                                                       |
|                                         |      | Do you have any allergies to medications?                                                                                                       |
| One<br>Sentence<br>(9 words<br>or more) | None | On a scale of 1 to 10, how much pain are you in right now?                                                                                      |
|                                         |      | Tell me more about the pain you have in your chest.                                                                                             |
|                                         |      | Have you had any ear pain or trouble hearing?                                                                                                   |
|                                         |      | When was the last time you saw a doctor for your condition?                                                                                     |
|                                         |      | Does the pain radiate to other parts of your body?                                                                                              |
|                                         |      | Call me if you have any questions or if anything changes.                                                                                       |
|                                         |      | When was the last time you saw your primary doctor?                                                                                             |
|                                         |      | It is important to exercise and eat a balanced diet.                                                                                            |
|                                         |      | Have you had any recent visits to the Emergency Department?                                                                                     |
|                                         |      | If you feel worse, just give my office a call and we can schedule you for an appointment immediately.                                           |
|                                         |      | Your imaging demonstrated that you had a good recovery, and we will continue to monitor you in order to make sure that you recover as expected. |
|                                         | 1+   | When was your last pap smear?                                                                                                                   |
|                                         |      | Are your symptoms getting better or worse or staying the same?                                                                                  |
|                                         |      | Do you have any side effects from the medication?                                                                                               |

|                  |      |                                                                                                                                                                                                                            |
|------------------|------|----------------------------------------------------------------------------------------------------------------------------------------------------------------------------------------------------------------------------|
|                  |      | We will closely monitor you and order more scans at your next follow-up visit.                                                                                                                                             |
|                  |      | You will not need to go under general anesthesia.                                                                                                                                                                          |
|                  |      | How old was your mother when she was diagnosed with high cholesterol?                                                                                                                                                      |
|                  |      | Does anyone in your family have diabetes, cancer, or heart problems?                                                                                                                                                       |
|                  |      | Have you had any nausea, vomiting, headaches, or any other symptoms recently?                                                                                                                                              |
| Two<br>Sentences | None | I'm looking at your chart and it looks like you've been in remission for six months now. How have you been feeling?                                                                                                        |
|                  |      | After surgery, you should expect to feel groggy. You may feel some pain, that we will treat as needed.                                                                                                                     |
|                  |      | You can refill your prescription at any pharmacy. It should be ready within the next hour.                                                                                                                                 |
|                  |      | Starting at midnight the night before the procedure, you can't have any solid food. It's okay to have water or apple juice when you wake up, but it's very important that you don't eat or drink two hours before surgery. |
|                  |      | Make sure that you avoid any strenuous exercise. Make sure you don't hit your head, and take precautions to prevent falling or anything that can be dangerous.                                                             |
|                  |      | I'm going to take your pulse. You can just relax.                                                                                                                                                                          |
|                  |      | Has your child ever had chickenpox, measles, mumps, whooping cough, or tuberculosis? Are all of your child's vaccinations up to date?                                                                                      |

|                 |      |                                                                                                                                                                                                                        |
|-----------------|------|------------------------------------------------------------------------------------------------------------------------------------------------------------------------------------------------------------------------|
|                 |      | Have you had any irregular periods? Have you had any spotting between periods?                                                                                                                                         |
|                 | 1+   | <p>Like I said, glaucoma doesn't have symptoms that you'd feel. The itching is probably due to seasonal allergies or dry eyes from sun exposure.</p>                                                                   |
| Three Sentences | None | I'm so sorry. You seem very upset. Is there anything I can do for you?                                                                                                                                                 |
|                 |      | It sounds like you've been feeling sick for a few days. I'm sorry to hear that. I'd like to run some tests to get a better sense of what's going on.                                                                   |
|                 |      | You'll take the medication for the nausea twice a day with meals, once with breakfast and once with dinner. You'll take the medication for pain every six hours or as needed between meals. Do you have any questions? |
|                 |      | We're hoping you can be discharged by tomorrow afternoon. It depends on whether you have a fever. I know you're ready to go home.                                                                                      |

|  |    |                                                                                                                                                                                                                                                                                                                                                                                                                        |
|--|----|------------------------------------------------------------------------------------------------------------------------------------------------------------------------------------------------------------------------------------------------------------------------------------------------------------------------------------------------------------------------------------------------------------------------|
|  |    | The nurse tells me you hurt your wrist playing basketball. Is it okay if I take a look? When I bend it like this, does it hurt?                                                                                                                                                                                                                                                                                        |
|  | 1+ | Let's get these tests done and then discuss further steps. Here's a referral to radiology, a lab slip, and a note for work. I'll see you back in four weeks, okay?                                                                                                                                                                                                                                                     |
|  |    | I think you may have torn your meniscus. If it is torn, we may have to intervene surgically. I'm going to give you a prescription for an anti-inflammatory to see if we can bring the swelling down, and I'll also give you a prescription for a pain medication.                                                                                                                                                      |
|  |    | If we do the procedure laparoscopically, we'll have you in and out after just one night. If we have to make a larger incision, you'll have to stay in the hospital for a bit longer, maybe up to a week. As for the anesthesia, you'll have general anesthesia given through an IV.                                                                                                                                    |
|  |    | I would like you to start taking one whole pill every other day. I'll give you another prescription for the other pills as well. If you don't tolerate the medication well, I'll take the case to Grand Rounds and see what my colleagues think.                                                                                                                                                                       |
|  |    | We need to discuss your medication plan before moving forward. I'd like you to discontinue the iron medication seven days before the procedure, the aspirin ten days before the procedure, and your arthritis medications--like Motrin or Advil--two days before the procedure. It's very important that you continue taking prednisone, your heart medications, your lung medications, and your diabetes medications. |
